# Supplementary material for: Halogen-containing bridged carborane–tetraphenylethene compounds: efficient and wide-range shifted excitation-dependent emissions
Source: Royal Society of Chemistry journal article supplement (doi:10.1039/d4nj02867h), 2024-01-01
Supplement: d4nj02867h1.pdf [file d4nj02867h1.pdf]

## Supplementary Information

### Halogen-containing bridged carborane-tetraphenylethene compound: efficient and wide-range shifted excitation-dependent emissions

Fengjiao Li<sup>a</sup>, Yiran Dong<sup>a</sup>, Jinling Miao<sup>\*b</sup>, Yong Nie<sup>\*a</sup>, Yujian Zhang<sup>\*c</sup>, Tianrui Li<sup>b</sup>, Chunyue Xu<sup>a</sup>,  
Guangning Liu<sup>b</sup>, Xuchuan Jiang<sup>\*a</sup>

<sup>a</sup>Institute for Smart Materials & Engineering, University of Jinan, No. 336 Nanxin Zhuang West Road, 250022 Jinan, P. R. China

<sup>b</sup>School of Chemistry and Chemical Engineering, University of Jinan, Shandong Provincial Key Laboratory of Fluorine Chemistry and Chemical Materials, No. 336 Nanxin Zhuang West Road, 250022 Jinan, P. R. China

<sup>c</sup>Key Laboratory of the Ministry of Education for Advanced Catalysis Materials, Department of Chemistry, Zhejiang Normal University, No. 688 Yingbin Road, Jinhua 321004, P. R. China

E-mail: chm\_niey@ujn.edu.cn, chm\_miaojl@ujn.edu.cn, ism\_jiangxc@ujn.edu.cn, Yujian1985@zjnu.edu.cn

#### Table of contents

Experimental section

Table. S1 Crystal data and structure refinement for **1**

Table. S2 Selected bond lengths, angles and torsion angles for **1**

Table. S3 Weak interaction in crystals of compound **1**

Fig. S1-11 Structural characterization of compounds **1-2**

Fig. S12 Frontier orbitals and the energy level of compound **1-2** (B3LYP/ 6-31g (d, p) level)

Fig. S13 Absorption spectrum of **1** in tetrahydrofuran calculated by TD-DFT method

Table. S4 Excitation energy and transitions of **1** in tetrahydrofuran calculated by TD-DFT method

Fig. S14 Absorption spectrum of **2** in tetrahydrofuran calculated by TD-DFT method

Table. S5 Excitation energy and transitions of **2** in tetrahydrofuran calculated by TD-DFT method

Fig. S15 Excitation spectra of powder **1** at different emission wavelengths

Fig. S16 Excitation spectrum of crystals of **1**

Fig. S17 Excitation spectrum of amorphous **1**

Fig. S18 Fluorescence decay curve of crystals of **1** ( $\lambda_{\text{ex}} = 340$  nm,  $\lambda_{\text{em}} = 408$  nm)

Fig. S19 Fluorescence decay curve of powder **1** ( $\lambda_{\text{ex}} = 380$  nm,  $\lambda_{\text{em}} = 467$  nm)

Fig. S20 Fluorescence decay curve of amorphous **1** ( $\lambda_{\text{ex}} = 390$  nm,  $\lambda_{\text{em}} = 480$  nm)

Fig. S21 CIE chromaticity diagrams of **1** (powder), **1** (ground), **1** (fumed) and **1** (annealed)

Fig. S22. Emission spectra of compound **1** (a) powder, (b) ground, (c) ground-CH<sub>2</sub>Cl<sub>2</sub> fumigation, (d) ground-annealed at different excitation wavelengths

Fig. S23. Emission spectra of compound **1** (a) crystal and (b) amorphous form at different excitation wavelengths

Fig. S24. Emission spectra of compound **2** (ground) at different excitation wavelengths (a: normalized, b: unnormalized)

Fig. S25 Excitation spectrum of powder **2**

Fig. S26 Fluorescence decay curve of powder **2** ( $\lambda_{\text{ex}} = 360 \text{ nm}$ ,  $\lambda_{\text{em}} = 450 \text{ nm}$ )

Table S6 Some photophysical data of compounds **1** and **2**

## Experimental section

### General

Standard Schlenk techniques were used for the synthetic reactions under Ar. Dichloromethane was (DCM) dried with calcium hydride, and other solvents were commercially available and used without further purification. IR spectra were recorded in the range 400-4000  $\text{cm}^{-1}$  on a Perkin Elmer Spectrum RX I spectrometer using KBr pellets. NMR analyses were performed on a Bruker Avance III 600 MHz and 400 MHz spectrometer.  $^{19}\text{F}$ -NMR and  $^{11}\text{B}$ -NMR spectra were recorded in dichloromethane solutions ( $\text{D}_2\text{O}$  was added for locking) on a Bruker AVANCE III 500 spectrometer. As internal references for  $^1\text{H}$ - and  $^{13}\text{C}$ -NMR spectroscopy the signals of  $\text{CDCl}_3$  were used and calculated relative to tetramethylsilane (TMS). Melting points were measured with a SGW X-4 apparatus and are not corrected. The high resolution mass spectra were measured on a Thermo Fisher Scientific LTQ FTICR-MS instrument (DART positive ion mode or ESI negative ion mode) and Waters Micromass GCT Premier (EI (70eV)). UV-Vis spectra were recorded on a UV3600 Plus spectrometer. Emission spectra were measured on Edinburgh FLS920 and FLS1000 fluorimeters, using a front-face sample configuration for solid samples. Absolute fluorescence quantum yields were obtained using an integrating sphere.

### Synthesis of compound 1

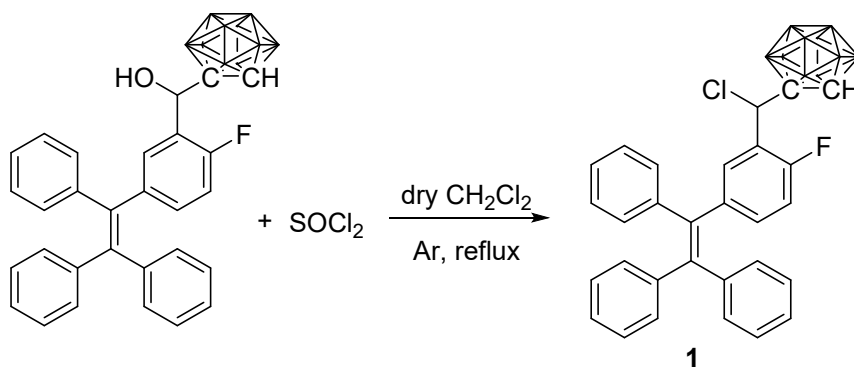

Under argon, the starting carboranymethanol compound (103.7 mg, 0.2 mmol) and 5 mL of dry  $\text{CH}_2\text{Cl}_2$  were added into a Schlenk tube and stirred, to this solution was added 0.5 mL of  $\text{SOCl}_2$  (6.9 mmol) via syringe. The reaction mixture was heated at 45  $^\circ\text{C}$  (oil bath) for 24 h, during which time the reaction was completed as monitored by TLC. The reaction mixture was poured into a cold saturated aqueous solution of  $\text{K}_2\text{CO}_3$  (20 mL) and separated. The water phase was extracted with  $\text{CH}_2\text{Cl}_2$  (3  $\times$  20 mL) and the combined organic phases were dried with anhydrous  $\text{Na}_2\text{SO}_4$ . After filtration and concentration the solution was separated by preparative TLC (eluent: EtOAc: hexane =

1:5, *V/V*) to give a yellow oil, which solidified after adding 2 mL of CH<sub>2</sub>Cl<sub>2</sub> and cured for 24 h to afford compound **1** as a white solid.

**1**: 52.8 mg, yield 48.8%; *m.p.* 149.7 °C; *R<sub>f</sub>* = 0.82 (EtOAc: hexane = 1:5, *V/V*) ; IR (KBr, *v/cm*<sup>-1</sup>): 3055, 2924, 2588 (BH), 1597, 1491, 1441, 1248, 847, 768, 741, 700; <sup>1</sup>H NMR (600 MHz, CDCl<sub>3</sub>) δ: 7.20 - 7.12 (m, 10 H, ArH), 7.04 - 7.02 (m, 5 H, ArH), 6.97 - 6.96 (m, 2 H, ArH), 6.87, 6.85 (t, *J* = 9.32 Hz, 1H, ArH), 5.76 (s, 1 H, CHCl ), 3.54 (s, 1 H, C<sub>cage</sub>H); <sup>13</sup>C NMR (151 MHz, CDCl<sub>3</sub>) δ: 158.10, 156.45, 143.07, 142.97, 142.85, 142.19, 141.05, 138.76, 134.56 (d, *J* = 7.55 Hz), 132.27, 131.29, 131.17 (d, *J* = 9.06 Hz), 128.20, 127.96, 127.78, 127.26, 126.87 (d, *J* = 6.04 Hz), 123.83 (d, *J* = 12.05 Hz), 115.22, 115.08, 76.50, 61.05, 54.12; <sup>11</sup>B{<sup>1</sup>H} NMR (128 MHz, CH<sub>2</sub>Cl<sub>2</sub>): δ -3.22 (1B), -4.43 (1B), -8.68 (1B), -9.33 (1B), -10.74 (1B), -11.73 (1B), -12.75 (2B), -14.00 (2B); <sup>19</sup>F NMR (377 MHz, CH<sub>2</sub>Cl<sub>2</sub>) δ: -119.46; ESI-MS *m/z*(%): calcd. for C<sub>29</sub>H<sub>29</sub>B<sub>10</sub>FCl, 541.2878 [M-H]<sup>-</sup>, found 541.2875.

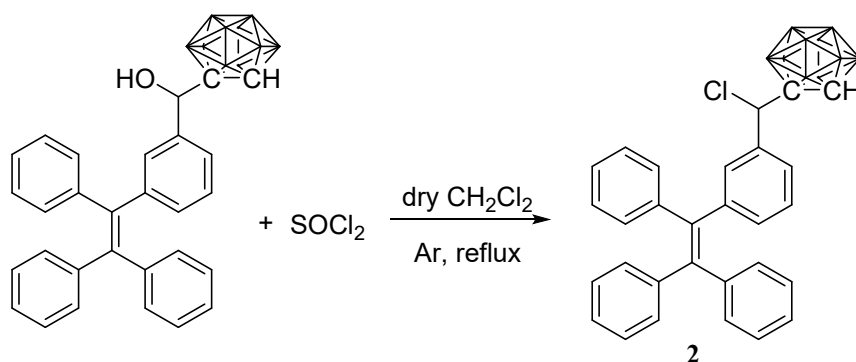

Under argon, the starting carboranymethanol compound (100.9 mg, 0.2 mmol) and 5 mL of dry CH<sub>2</sub>Cl<sub>2</sub> were added into a Schlenk tube and stirred, to this solution was added 0.5 mL of SOCl<sub>2</sub> (6.9 mmol) via syringe. The reaction mixture was heated at 45 °C (oil bath) for 24 h, during which time the reaction was completed as monitored by TLC. The reaction mixture was poured into a cold saturated aqueous solution of K<sub>2</sub>CO<sub>3</sub> (20 mL) and separated. The water phase was extracted with CH<sub>2</sub>Cl<sub>2</sub> (3 × 20 mL) and the combined organic phases were dried with anhydrous Na<sub>2</sub>SO<sub>4</sub>. After filtration and concentration the solution was separated by preparative TLC (eluent: EtOAc: hexane = 1:5, *V/V*) to give a yellow oil, which solidified after adding 2 mL of CH<sub>2</sub>Cl<sub>2</sub> and cured for 24 h to afford compound **2** as a white solid.

**2**: 75.2 mg, yield 72.0%; *m.p.* 175.2 °C; *R<sub>f</sub>* = 0.84 (EtOAc: hexane = 1:5, *V/V*) ; IR (KBr, *v/cm*<sup>-1</sup>): 3053, 2922, 2851, 2578(BH), 1597, 1489, 1441, 1096, 1020, 758, 698; <sup>1</sup>H NMR (600 MHz, CDCl<sub>3</sub>) δ: 7.16 (t, *J* = 7.6 Hz, 1H, ArH), 7.11 (m, 10H, ArH), 7.09 (d, *J* = 7.6 Hz, 1H, ArH), 7.04 - 7.01 (m,

5H, ArH), 6.97 (m, 2H, ArH), 5.26 (s, 1H, CHCl), 3.54 (s, 1H, C<sub>cage</sub>H); <sup>13</sup>C NMR (151 MHz, CDCl<sub>3</sub>) δ 144.85, 143.20, 143.07, 143.04, 142.14, 139.60, 136.01, 132.94, 131.33, 131.24, 131.19, 130.80, 128.37, 128.05, 127.88, 127.76, 126.78, 126.76, 126.04, 62.45, 61.17; <sup>11</sup>B{<sup>1</sup>H} NMR (128 MHz, CH<sub>2</sub>Cl<sub>2</sub>): δ -3.35 (1B), -4.38 (1B), -8.64 (1B), -9.32 (1B), -10.51 (1B), -11.81 (1B), -12.80 (2B), -14.01 (2B); DART-MS m/z(%): calcd. for C<sub>29</sub>H<sub>32</sub>B<sub>10</sub>Cl [M+H]<sup>+</sup>, 525.3188, found 525.3162.

**Table S1** Crystal data and structure refinement for **1**

| Compound                                    | <b>1</b>                                                   |
|---------------------------------------------|------------------------------------------------------------|
| Empirical formula                           | C <sub>29</sub> H <sub>30</sub> B <sub>10</sub> ClF        |
| Formula weight                              | 541.08                                                     |
| Temperature/K                               | 293(2)                                                     |
| Crystal system                              | monoclinic                                                 |
| Space group                                 | C2/c                                                       |
| a/Å                                         | 14.1612(4)                                                 |
| b/Å                                         | 12.8676(4)                                                 |
| c/Å                                         | 31.9346(10)                                                |
| α/°                                         | 90                                                         |
| β/°                                         | 98.367(3)                                                  |
| γ/°                                         | 90                                                         |
| Volume/Å <sup>3</sup>                       | 5757.2(3)                                                  |
| Z                                           | 8                                                          |
| ρ <sub>calc</sub> /g/cm <sup>3</sup>        | 1.248                                                      |
| μ/mm <sup>-1</sup>                          | 0.159                                                      |
| F(000)                                      | 2240                                                       |
| Crystal size/mm <sup>3</sup>                | 0.2×0.18×0.08                                              |
| Radiation                                   | MoKα (λ = 0.71073)                                         |
| 2θ range for data collection/°              | 4.298 to 56.562                                            |
| Index ranges                                | -16 ≤ h ≤ 18, -17 ≤ k ≤ 17,<br>-42 ≤ l ≤ 42                |
| Reflections collected                       | 8724                                                       |
| Independent reflections                     | 8724 [R <sub>int</sub> = , R <sub>sigma</sub> =<br>0.0296] |
| Data/restraints/parameters                  | 8724/0/373                                                 |
| Goodness-of-fit on F <sup>2</sup>           | 1.123                                                      |
| Final R indexes [I >= 2σ (I)]               | R <sub>1</sub> = 0.0746, wR <sub>2</sub> = 0.2028          |
| Final R indexes [all data]                  | R <sub>1</sub> = 0.0823, wR <sub>2</sub> = 0.1816          |
| Largest diff. peak/hole / e Å <sup>-3</sup> | 0.478/-0.515                                               |
| CCDC deposition number                      | 2304126                                                    |

**Table S2.** Selected bond lengths, angles and torsion angles for **1**

| bond lengths (Å) |       | bond angles [°] |        | torsion angles [°] |        |
|------------------|-------|-----------------|--------|--------------------|--------|
| C1-C2            | 1.394 | C1-C2-C3        | 120.07 | C1-C2-C3-C4        | -1.09  |
| C2-C3            | 1.398 | C2-C3-C4        | 119.93 | C6-C1-C7-C8        | -48.54 |
| C3-C4            | 1.380 | C1-C7-C8        | 114.77 | C1-C7-C8-C9        | -48.20 |
| C1-C7            | 1.499 | C7-C8-C13       | 122.75 | C8-C7-C14-C21      | -6.43  |
| C7-C8            | 1.498 | C7-C8-C9        | 118.57 | C26-C25-C27-C11    | -39.60 |
| C8-C9            | 1.403 | C8-C7-C14       | 122.79 | C27-C25-C24-F1     | 2.30   |
| C7-C14           | 1.349 | C25-C27-C28     | 114.88 | C11-C27-C28-C29    | 20.89  |
| C14-C21          | 1.505 | C24-C25-C27     | 119.51 |                    |        |
| C21-C22          | 1.386 | C25-C27-C11     | 110.01 |                    |        |
| C23-C24          | 1.383 | C27-C28-C29     | 120.98 |                    |        |
| C24-F1           | 1.355 |                 |        |                    |        |
| C25-C27          | 1.505 |                 |        |                    |        |
| C27-C28          | 1.545 |                 |        |                    |        |
| C28-C29          | 1.641 |                 |        |                    |        |
| C27-C11          | 1.791 |                 |        |                    |        |

**Table S3** Weak interactions in crystals of compound **1**

| D-H...A               | d(H...A) [Å] | d(D...A) [Å] | ∠(D-H...A)<br>[°] |
|-----------------------|--------------|--------------|-------------------|
| B(4)-H(4A)...Cg(1)    | 2.642        | 3.645        | 151.17            |
| C(29)-H(29)...Cl(1)   | 2.738        | 3.118        | 99.76             |
| C(26)-H(26)...Cl(1)   | 2.774        | 3.073        | 99.83             |
| C(27)-H(27)...F(1)    | 2.333        | 2.772        | 106.24            |
| C(5)-H(5)...Cg(2)     | 2.870        | 3.596        | 135.8             |
| C(24)-F(1)...Cg(1)    | 3.456        | 4.579        | 140.14            |
| C(29)-H(29)...H(7)-B7 | 2.267        | 2.982        | 120.65            |

Cg(1): (C8, C9, C10, C11, C12, C13), Cg(2): (C21, C22, C23, C24, C25, C26)

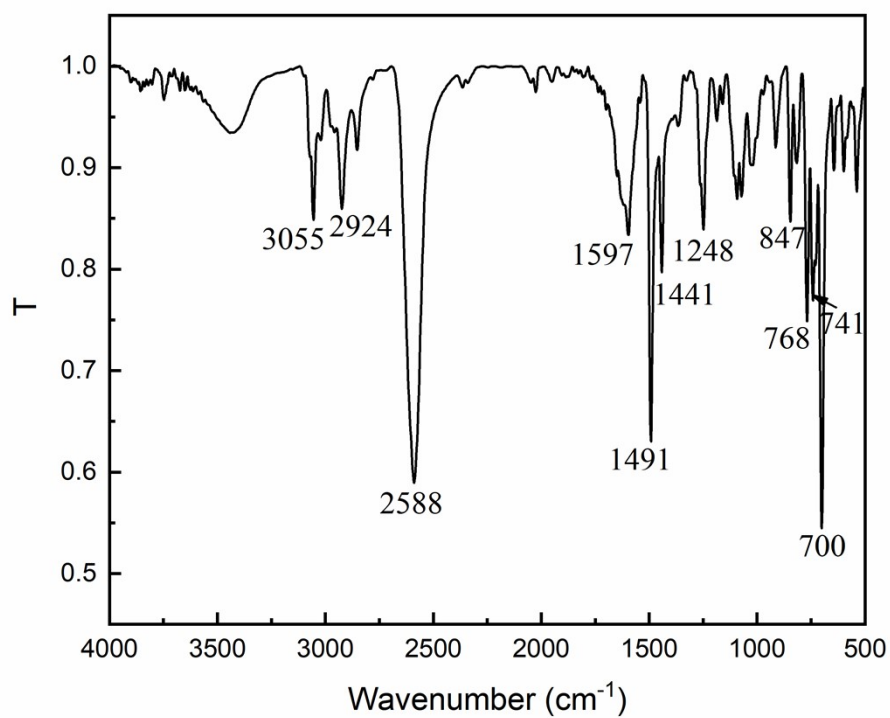

**Fig. S1.** FT-IR spectrum of **1** (KBr pellet)

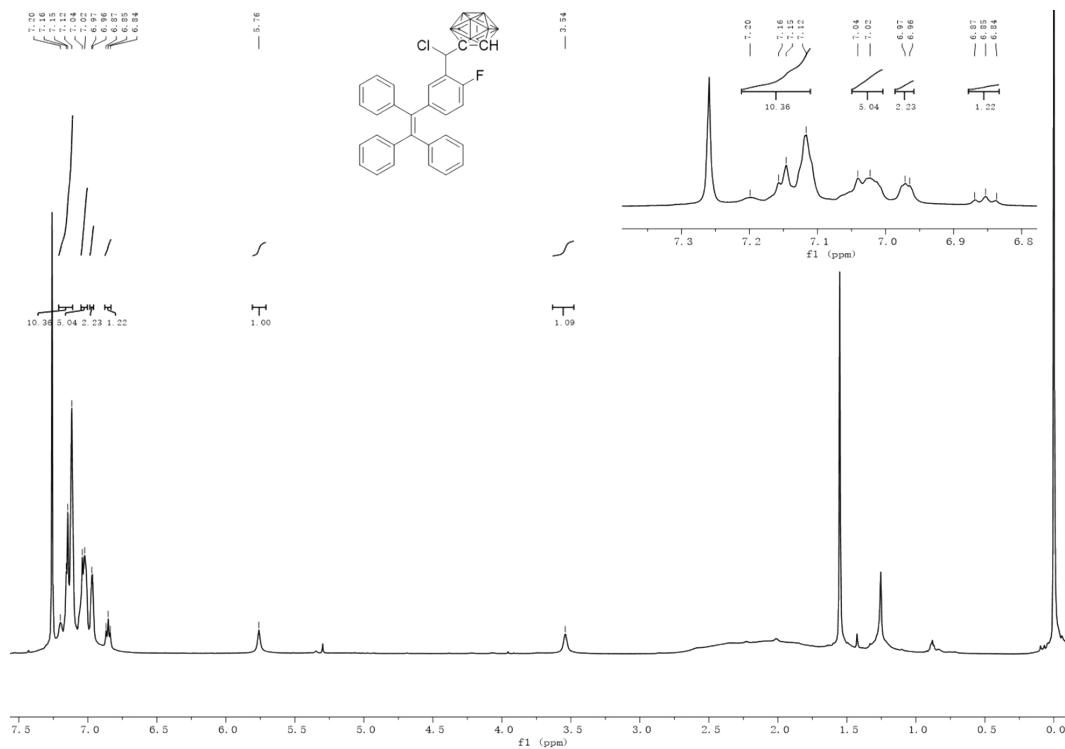

**Fig. S2.**  $^1\text{H-NMR}$  spectrum of **1** in  $\text{CDCl}_3$

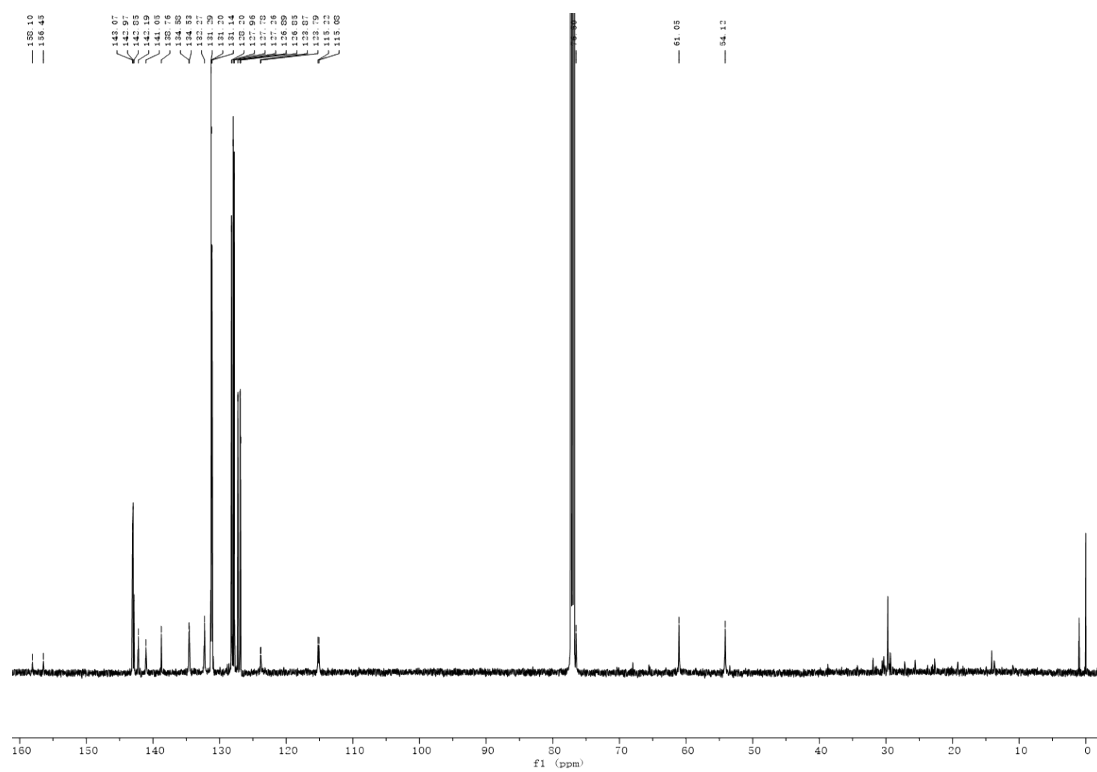

**Fig. S3.**  $^{13}\text{C}$ -NMR spectrum of **1** in  $\text{CDCl}_3$

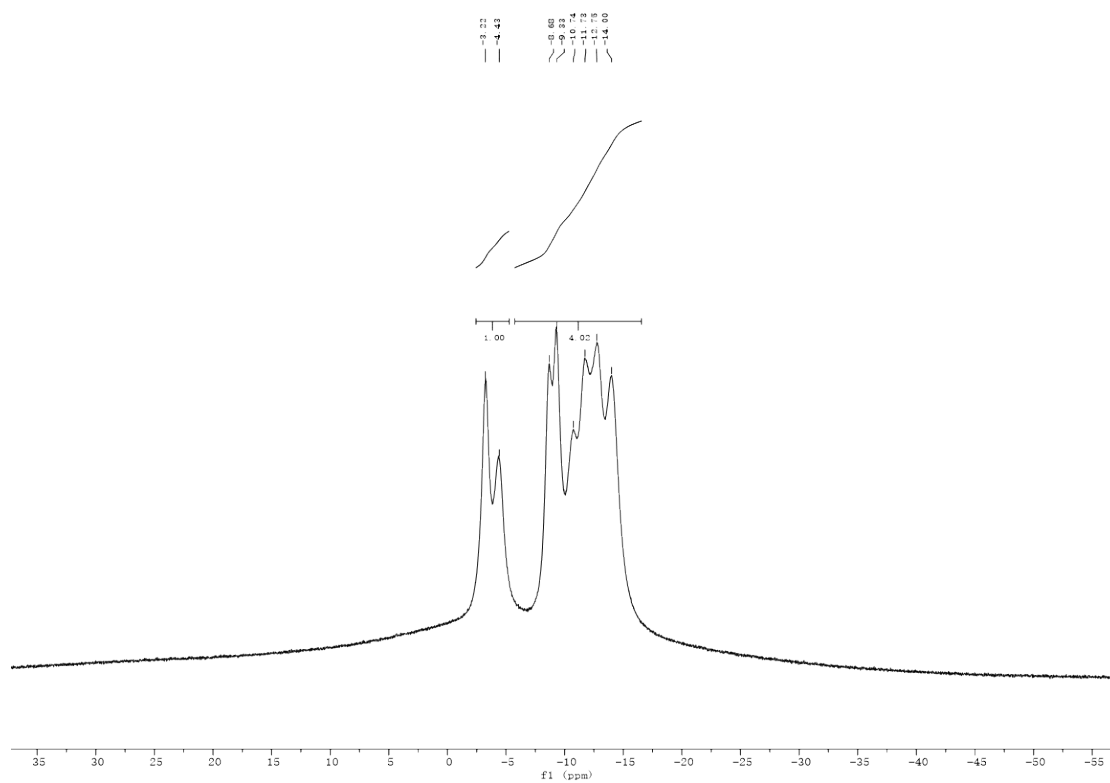

**Fig. S4.**  $^{11}\text{B}\{^1\text{H}\}$ -NMR spectrum of **1** in  $\text{CH}_2\text{Cl}_2$



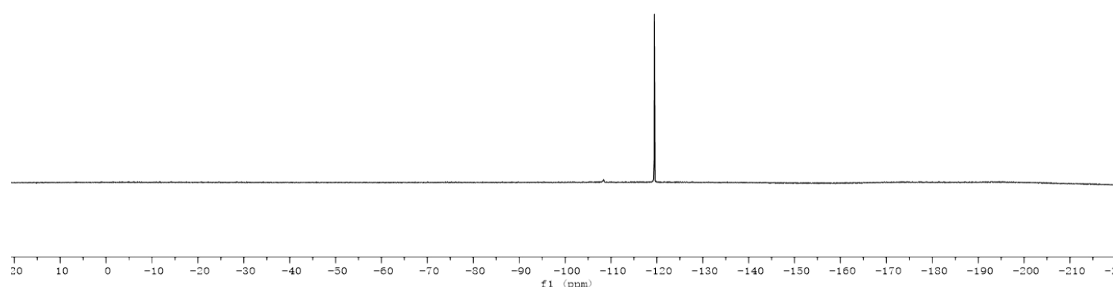

**Fig. S5.**  $^{19}\text{F}$ -NMR spectrum of **1** in  $\text{CH}_2\text{Cl}_2$

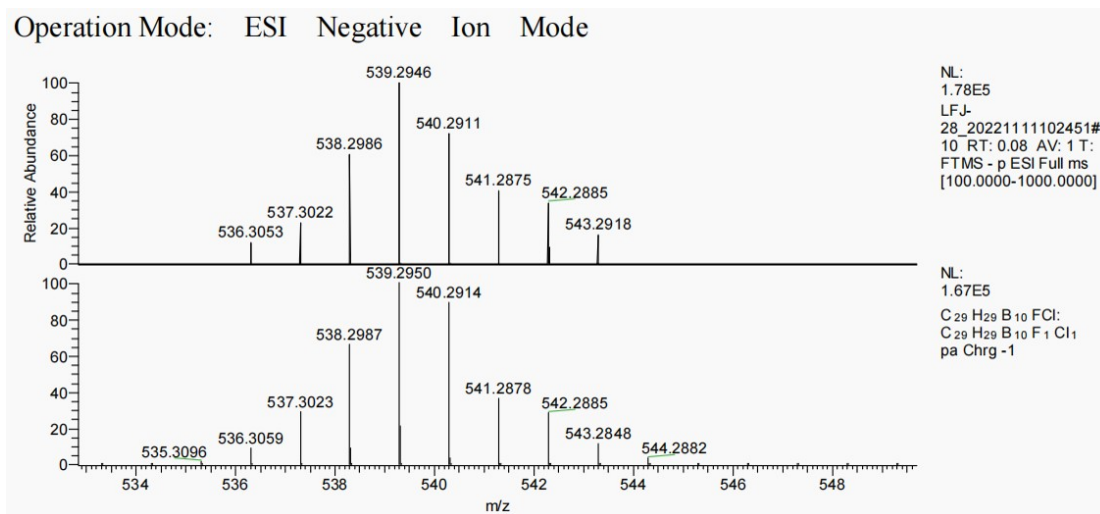

**Fig. S6.** High resolution mass spectrum of **1** (top: experimental, bottom: theoretical)

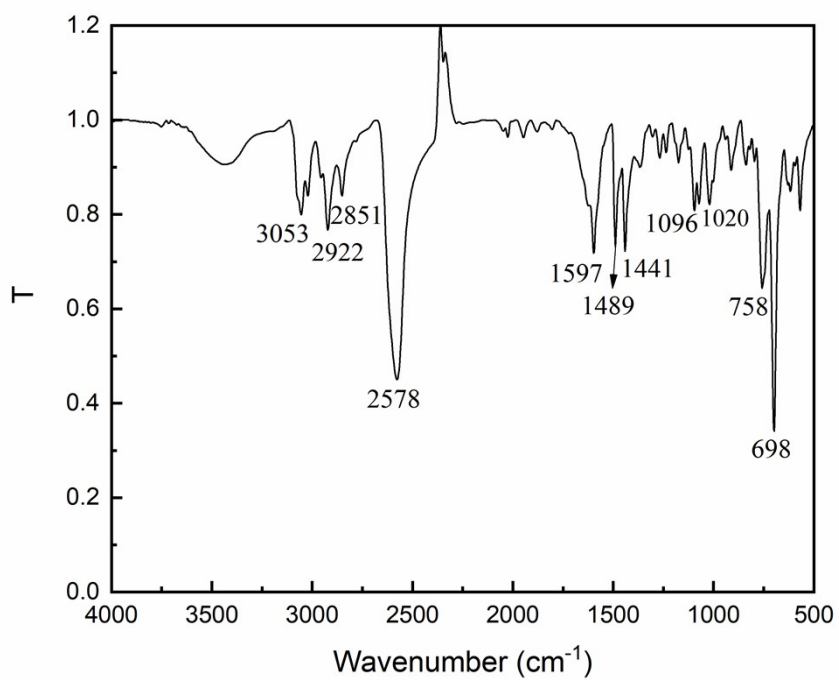

**Fig. S7.** FT-IR spectrum of **2** (KBr pellet)

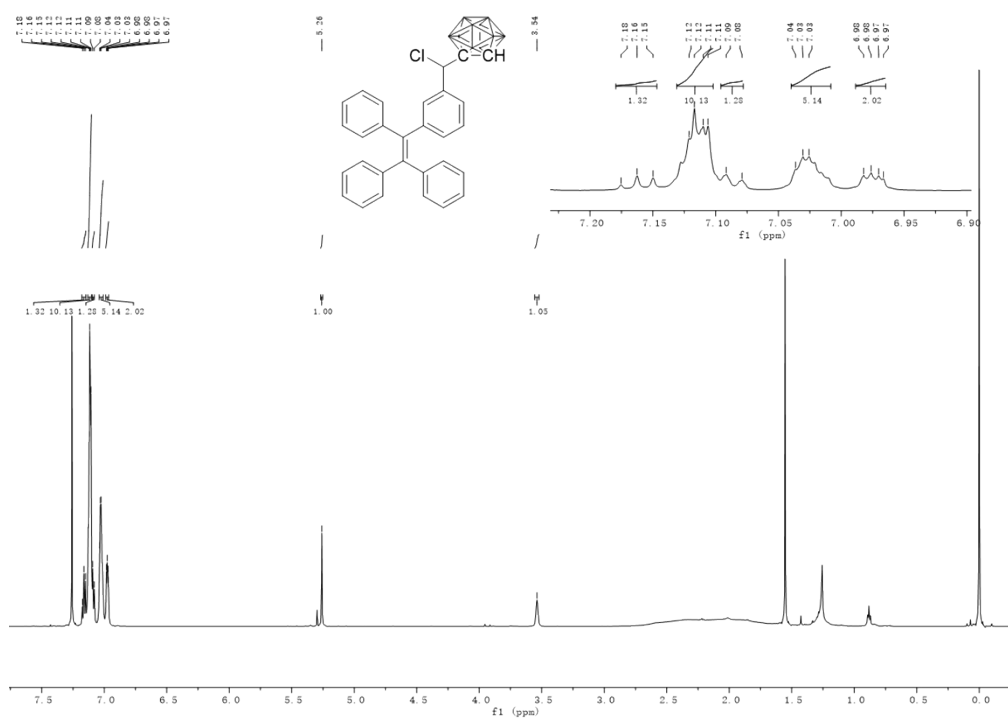

**Fig. S8.**  $^1\text{H-NMR}$  spectrum of **2** in  $\text{CDCl}_3$

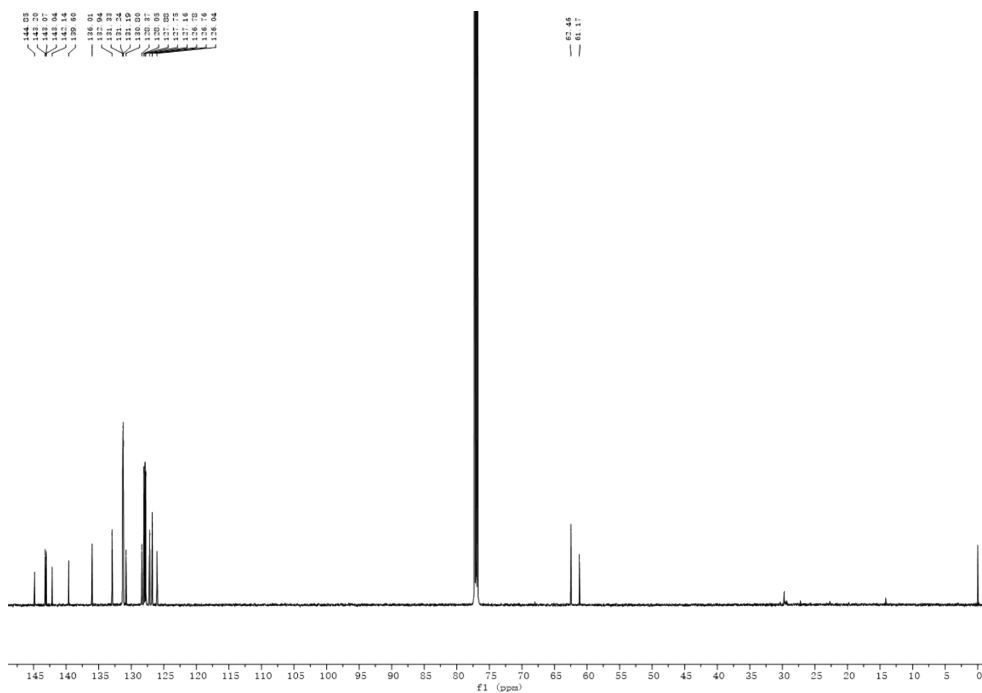

**Fig. S9.**  $^{13}\text{C}$ -NMR spectrum of **2** in  $\text{CDCl}_3$

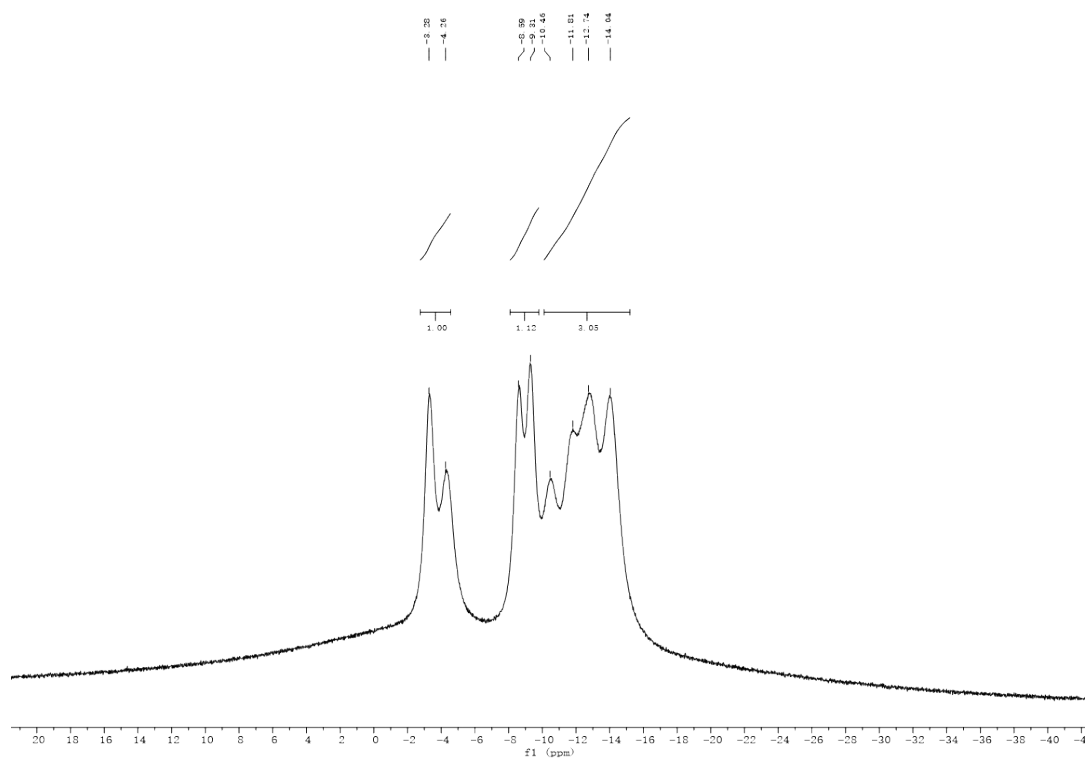

**Fig. S10.**  $^{11}\text{B}\{^1\text{H}\}$ -NMR spectrum of **2** in  $\text{CH}_2\text{Cl}_2$

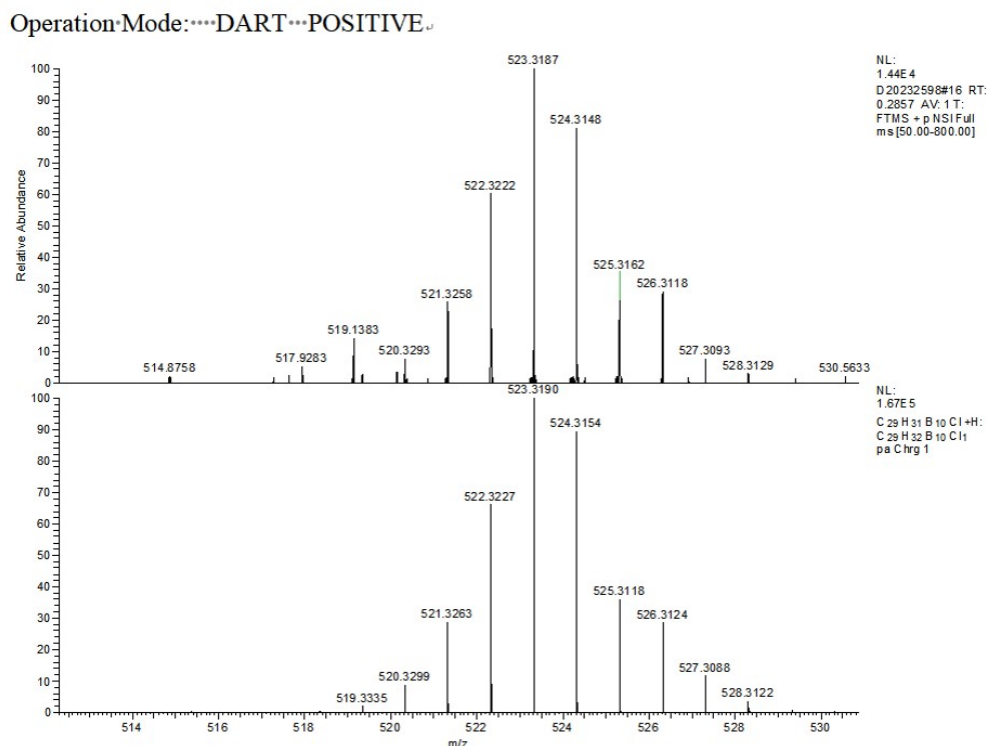

**Figure S11** High resolution mass spectrum of **2** (top: experimental, bottom: theoretical)

**Reference for the Gaussian package for the DFT calculations:**

M. J. Frisch, G. W. Trucks, H. B. Schlegel, G. E. Scuseria, M. A. Robb, J. R. Cheeseman, G. Scalmani, V. Barone, B. Mennucci, G. A. Petersson, H. Nakatsuji, M. Caricato, X. Li, H. P. Hratchian, A. F. Izmaylov, J. Bloino, G. Zheng, J. L. Sonnenberg, M. Hada, M. Ehara, K. Toyota, R. Fukuda, J. Hasegawa, M. Ishida, T. Nakajima, Y. Honda, O. Kitao, H. Nakai, T. Vreven, J. A. Montgomery, Jr., J. E. Peralta, F. Ogliaro, M. Bearpark, J. J. Heyd, E. Brothers, K. N. Kudin, V. N. Staroverov, R. Kobayashi, J. Normand, K. Raghavachari, A. Rendell, J. C. Burant, S. S. Iyengar, J. Tomasi, M. Cossi, N. Rega, J. M. Millam, M. Klene, J. E. Knox, J. B. Cross, V. Bakken, C. Adamo, J. Jaramillo, R. Gomperts, R. E. Stratmann, O. Yazyev, A. J. Austin, R. Cammi, C. Pomelli, J. W. Ochterski, R. L. Martin, K. Morokuma, V. G. Zakrzewski, G. A. Voth, P. Salvador, J. J. Dannenberg, S. Dapprich, A. D. Daniels, O. Farkas, J. B. Foresman, J. V. Ortiz, J. Cioslowski, and D. J. Fox, Gaussian 09, Revision A.02, Gaussian, Inc., Wallingford CT, 2009.

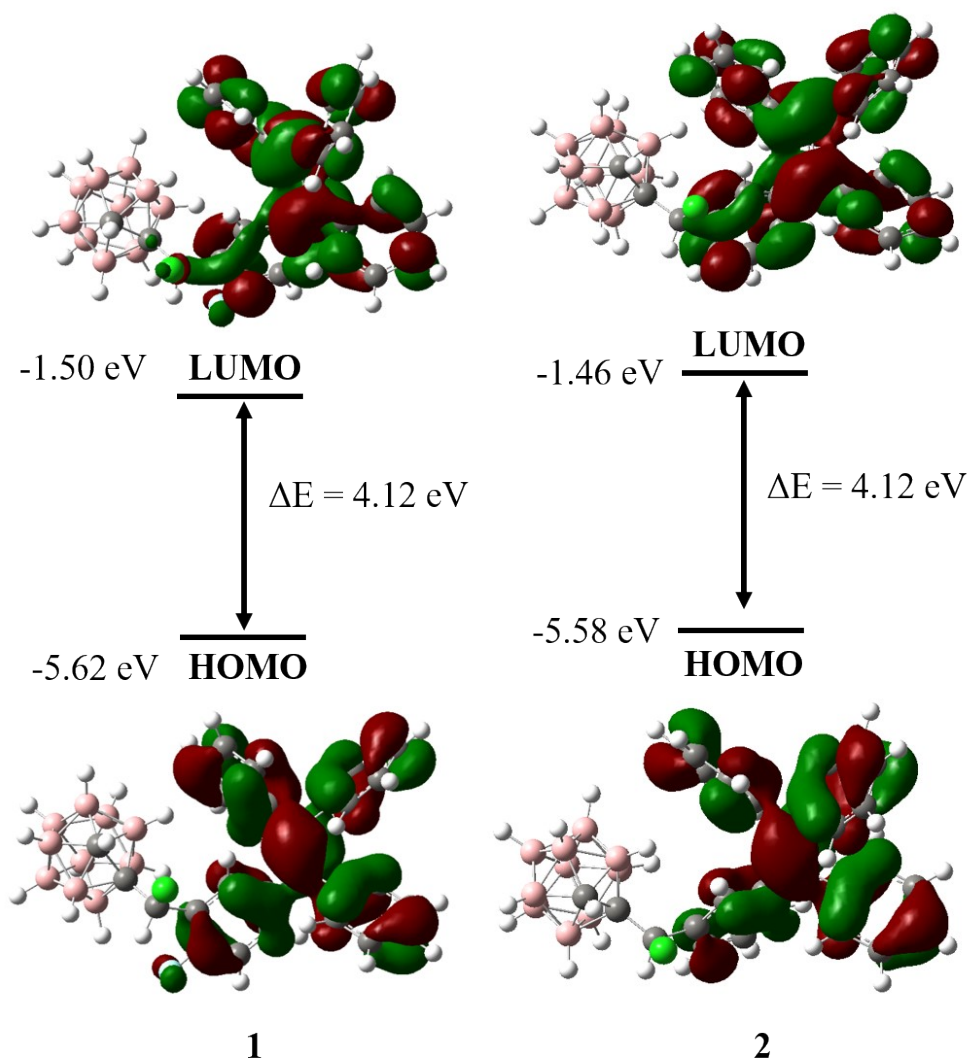

**Fig. S12** Frontier orbitals and energy levels of compounds 1-2 (B3LYP/ 6-31g (d, p) level)

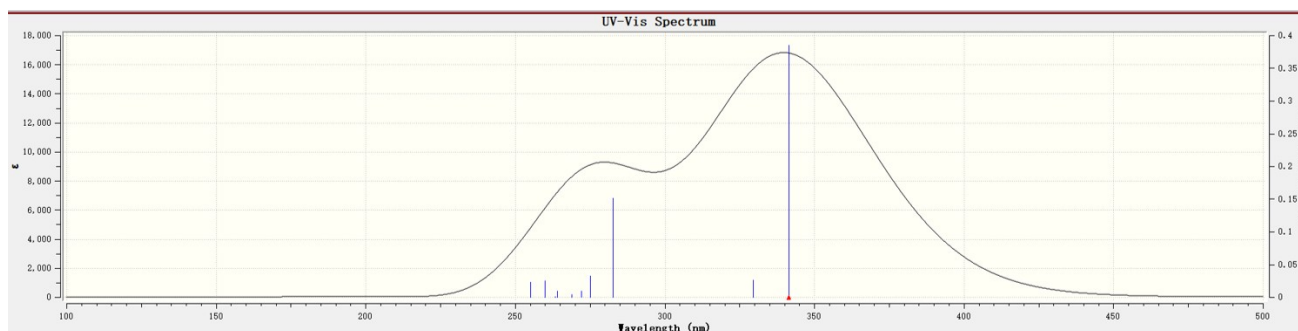

**Fig. S13** Absorption spectrum of 1 in tetrahydrofuran calculated by TD-DFT method

**Table S4** Excitation energy and transitions of 1 in tetrahydrofuran calculated by TD-DFT method<sup>a</sup>

| state | E (eV) | $\lambda$ (nm) | $f$    | transitions           |
|-------|--------|----------------|--------|-----------------------|
| 1     | 3.6303 | 341.53         | 0.3856 | HOMO→LUMO (99.1%)     |
| 2     | 3.7614 | 329.62         | 0.0265 | HOMO→LUMO + 1 (97.7%) |
| 3     | 4.3870 | 282.62         | 0.1521 | HOMO - 5→LUMO (2.8%)  |

|    |        |        |        |                                                                                                                                                                                                |
|----|--------|--------|--------|------------------------------------------------------------------------------------------------------------------------------------------------------------------------------------------------|
| 4  | 4.5075 | 275.06 | 0.0325 | HOMO→LUMO + 2 (90.3%)<br>HOMO - 1→LUMO (34.0%)<br>HOMO→LUMO + 2 (4.0%)<br>HOMO→LUMO + 3 (36.1%)<br>HOMO→LUMO + 4 (11.1%)<br>HOMO→LUMO + 5 (4.0%)<br>HOMO→LUMO + 6 (2.7%)                       |
| 5  | 4.5552 | 272.18 | 0.0093 | HOMO - 3→LUMO (2.3%)<br>HOMO - 1→LUMO (42.5%)<br>HOMO→LUMO + 3 (36.7%)<br>HOMO→LUMO + 4 (4.3%)<br>HOMO→LUMO + 5 (9.5%)                                                                         |
| 6  | 4.6127 | 268.79 | 0.0038 | HOMO - 2→LUMO (79.2%)<br>HOMO - 2→LUMO + 1 (2.2%)<br>HOMO→LUMO + 4 (2.2%)<br>HOMO→LUMO + 7 (2.3%)<br>HOMO→LUMO + 8 (6.6%)                                                                      |
| 7  | 4.6955 | 264.05 | 0.0098 | HOMO - 4→LUMO (5.1%)<br>HOMO - 3→LUMO (9.8%)<br>HOMO→LUMO + 3 (19.6%)<br>HOMO→LUMO + 4 (39.8%)<br>HOMO→LUMO + 5 (13.1%)<br>HOMO→LUMO + 6 (7.1%)                                                |
| 8  | 4.7059 | 263.47 | 0.0015 | HOMO - 4→LUMO (5.8%)<br>HOMO - 3→LUMO (46.5%)<br>HOMO - 2→LUMO (1.1%)<br>HOMO - 1→LUMO (3.1%)<br>HOMO→LUMO + 4 (9.8%)<br>HOMO→LUMO + 5 (2.9%)<br>HOMO→LUMO + 6 (4.9%)<br>HOMO→LUMO + 7 (16.9%) |
| 9  | 4.7684 | 260.01 | 0.0254 | HOMO - 3→LUMO (9.7%)<br>HOMO - 1→LUMO (13.3%)<br>HOMO→LUMO + 5 (59.3%)<br>HOMO→LUMO + 6 (5.4%)                                                                                                 |
| 10 | 4.8626 | 254.98 | 0.0227 | HOMO - 7→LUMO (2.8%)<br><br>HOMO - 4→LUMO (4.8%)<br>HOMO - 4→LUMO + 1 (2.3%)<br>HOMO - 2 →LUMO + 1<br>(7.9%)<br>HOMO - 1→LUMO + 1 (62.0%)<br>HOMO→LUMO + 4 (4.3%)<br>HOMO→LUMO + 7 (3.7%)      |

<sup>a</sup>calculated at the B3LYP/6-31G (d,p) level of theory.

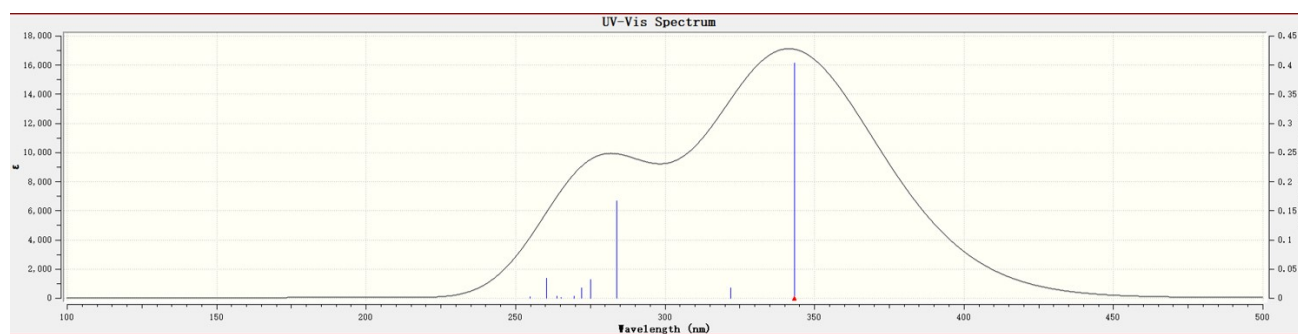

**Fig. S14** Absorption spectrum of **2** in tetrahydrofuran calculated by TD-DFT method

**Table S5** Excitation energy and transitions of **2** in tetrahydrofuran calculated by TD-DFT method<sup>a</sup>

| state | E (eV) | $\lambda$ (nm) | $f$    | transitions                                                                                                                                                                                    |
|-------|--------|----------------|--------|------------------------------------------------------------------------------------------------------------------------------------------------------------------------------------------------|
| 1     | 3.6127 | 343.19         | 0.4038 | HOMO→LUMO (99.1%)                                                                                                                                                                              |
| 2     | 3.8500 | 322.03         | 0.0176 | HOMO→LUMO + 1 (97.2%)                                                                                                                                                                          |
| 3     | 4.3683 | 283.83         | 0.1669 | HOMO→LUMO + 2 (91.6%)                                                                                                                                                                          |
| 4     | 4.5055 | 275.18         | 0.0324 | HOMO - 1→LUMO (42.9%)<br>HOMO→LUMO + 3 (22.0%)<br>HOMO→LUMO + 4 (17.2%)<br>HOMO→LUMO + 5 (7.5%)                                                                                                |
| 5     | 4.5569 | 272.08         | 0.0180 | HOMO - 3→LUMO (4.4%)<br>HOMO - 1→LUMO (29.4%)<br>HOMO→LUMO + 3 (37.0%)<br>HOMO→LUMO + 4 (11.5%)<br>HOMO→LUMO + 5 (11.5%)                                                                       |
| 6     | 4.6013 | 269.45         | 0.0039 | HOMO - 2→LUMO (79.3%)<br>HOMO - 1→LUMO (2.8%)<br>HOMO→LUMO + 8 (6.5%)                                                                                                                          |
| 7     | 4.6747 | 265.22         | 0.0009 | HOMO - 4→LUMO (3.6%)<br>HOMO - 3→LUMO (57.2%)<br>HOMO - 2→LUMO (5.1%)<br>HOMO - 1→LUMO (3.3%)<br>HOMO→LUMO + 4 (2.2%)<br>HOMO→LUMO + 5 (6.1%)<br>HOMO→LUMO + 6 (3.9%)<br>HOMO→LUMO + 7 (10.9%) |
| 8     | 4.7012 | 263.73         | 0.0040 | HOMO - 4→LUMO (9.4%)<br>HOMO - 3→LUMO (6.6%)<br>HOMO - 1→LUMO (2.4%)<br>HOMO→LUMO + 3 (28.3%)<br>HOMO→LUMO + 4 (33.8%)                                                                         |

HOMO→LUMO + 6 (11.8%)

|    |        |        |        |                                                                                                                                                                                                           |
|----|--------|--------|--------|-----------------------------------------------------------------------------------------------------------------------------------------------------------------------------------------------------------|
| 9  | 4.7608 | 260.43 | 0.0349 | HOMO - 3→LUMO (6.8%)<br>HOMO - 1→LUMO (13.6%)<br>HOMO→LUMO + 4<br>(2.5%)<br>HOMO→LUMO + 5 (68.3%)                                                                                                         |
| 10 | 4.8663 | 254.78 | 0.0023 | HOMO - 5→LUMO (2.8%)<br>HOMO - 4→LUMO (32.5%)<br>HOMO - 3→LUMO (17.4%)<br>HOMO - 1 →LUMO + 1<br>(2.4%)<br>HOMO →LUMO + 3 (4.3%)<br>HOMO→LUMO + 4 (22.9%)<br>HOMO→LUMO + 6 (16.3%)<br>HOMO→LUMO + 7 (3.6%) |

<sup>a</sup>calculated at the B3LYP/6-31G (d,p) level of theory.

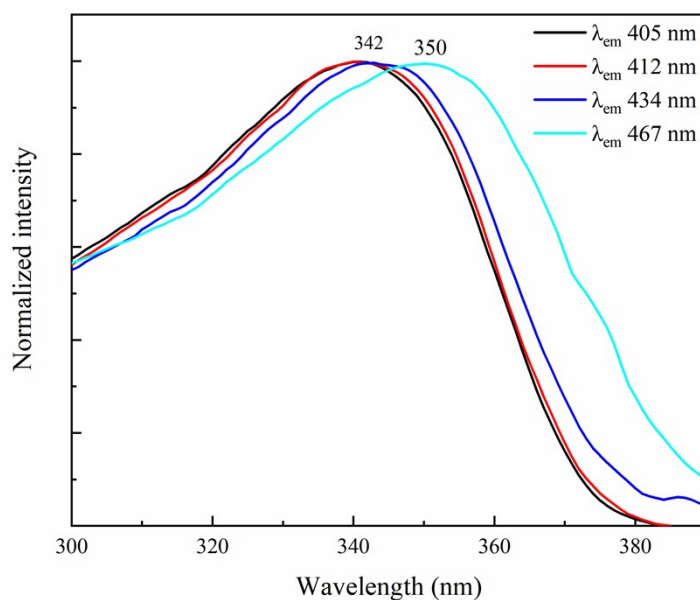

**Fig. S15.** Excitation spectra of powder **1** at different emission wavelengths



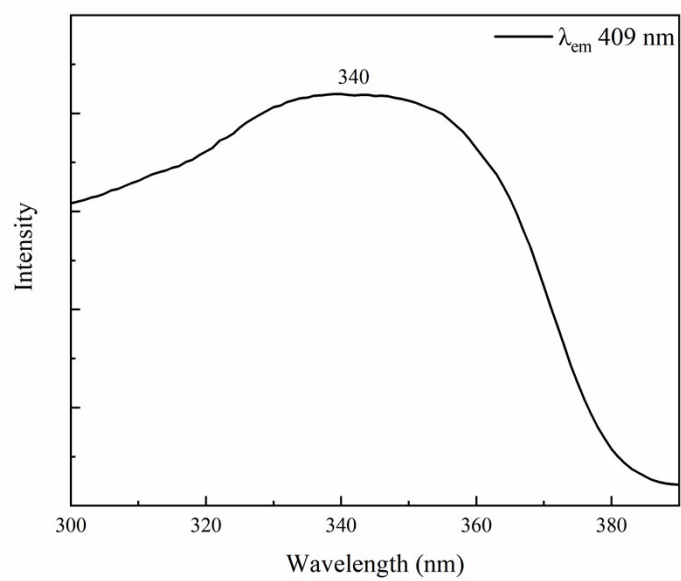

**Fig. S16.** Excitation spectrum of crystals of **1**

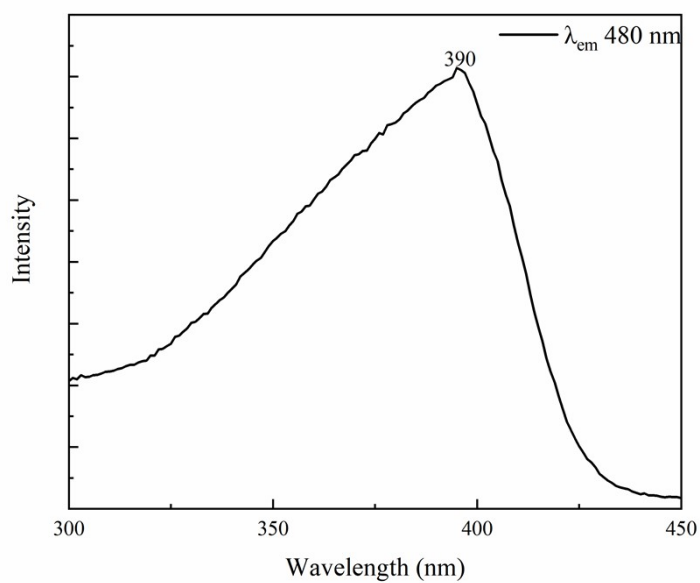

**Fig. S17.** Excitation spectrum of amorphous **1**

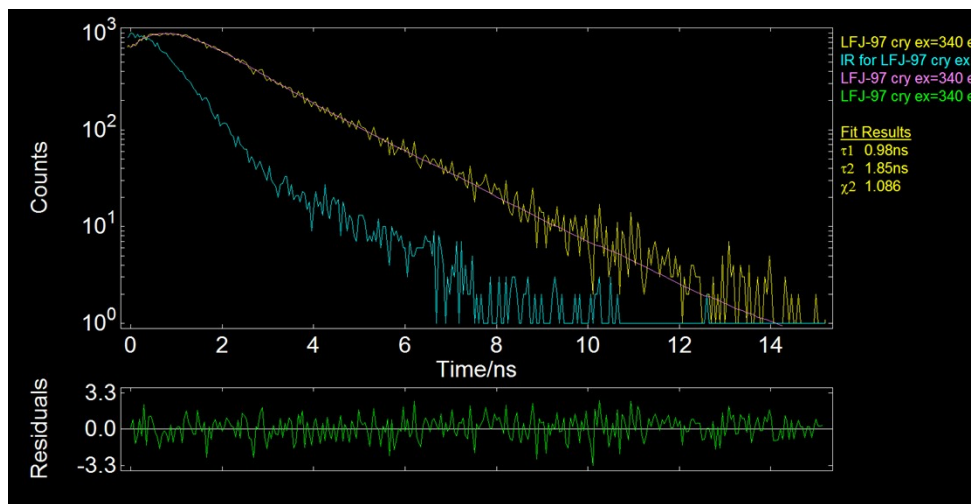

**Fig. S18.** Fluorescence decay curve of crystals of **1** ( $\lambda_{\text{ex}} = 340$  nm,  $\lambda_{\text{em}} = 408$  nm)

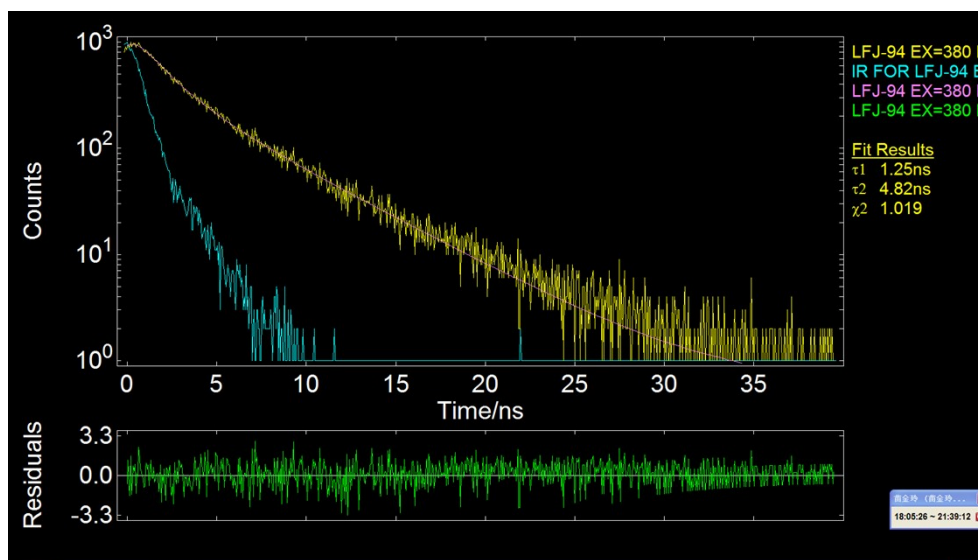

**Fig. S19.** Fluorescence decay curve of powder of **1** ( $\lambda_{\text{ex}} = 380$  nm,  $\lambda_{\text{em}} = 467$  nm)

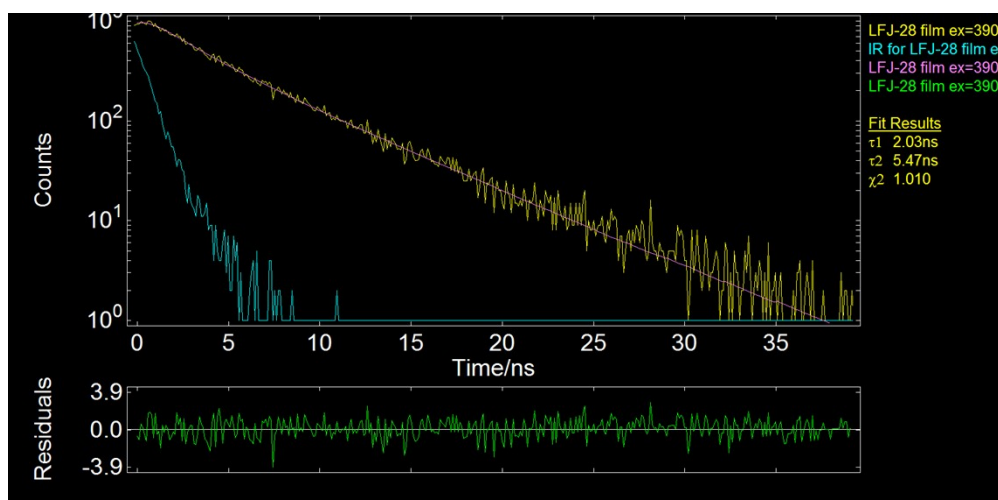

**Fig. S20.** Fluorescence decay curve of amorphous **1** ( $\lambda_{\text{ex}} = 390$  nm,  $\lambda_{\text{em}} = 480$  nm)

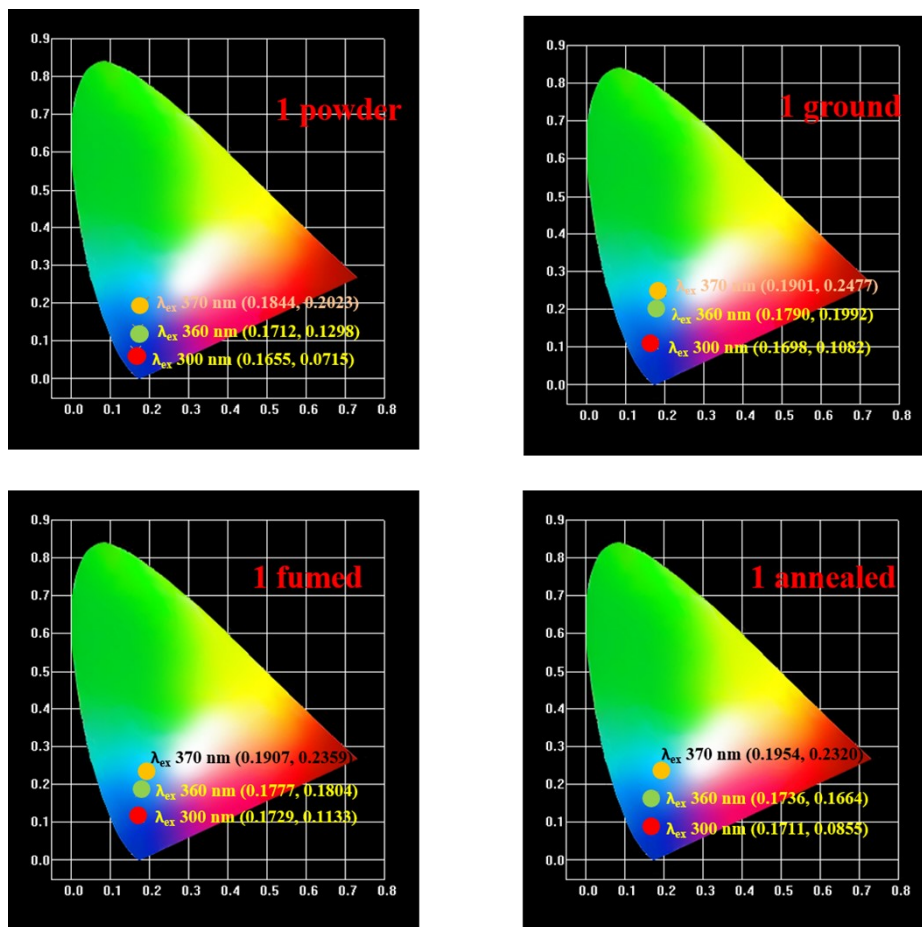

**Fig. S21.** CIE chromaticity diagrams of **1** (powder), **1** (ground), **1** (fumed) and **1** (annealed)

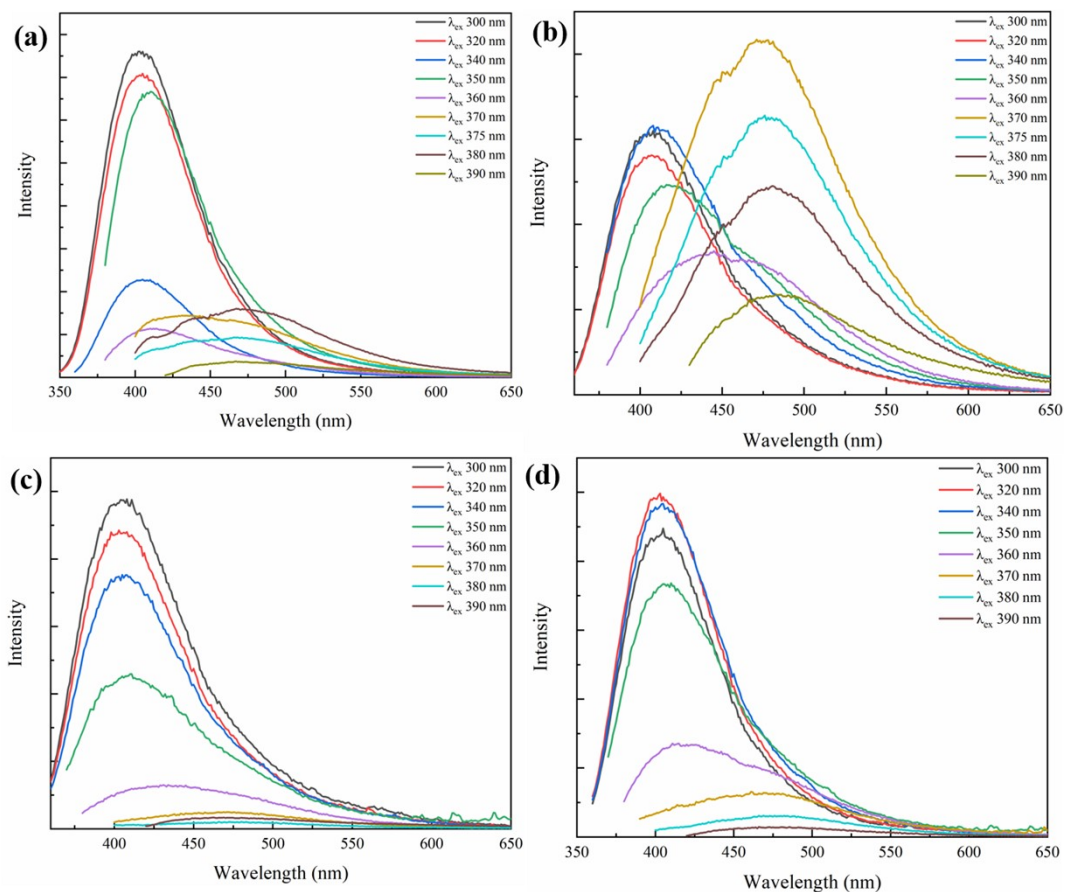

**Fig. S22.** Emission spectra of compound 1 (a) powder, (b) ground, (c) ground-CH<sub>2</sub>Cl<sub>2</sub> fumigation, (d) ground - heated annealing at different excitation wavelengths

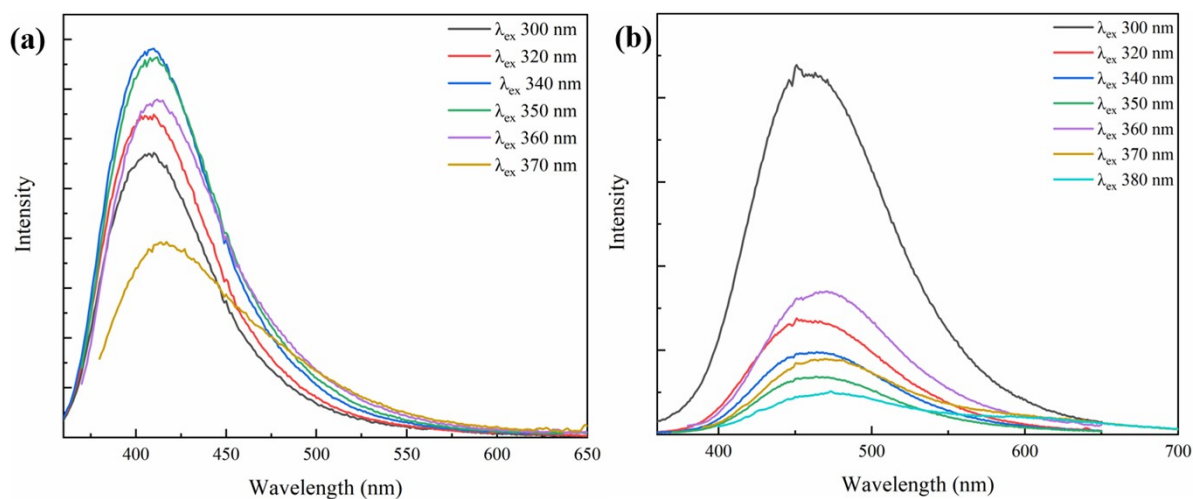

**Fig. S23.** Emission spectra of compound 1 (a) crystal and (b) amorphous form at different excitation wavelengths

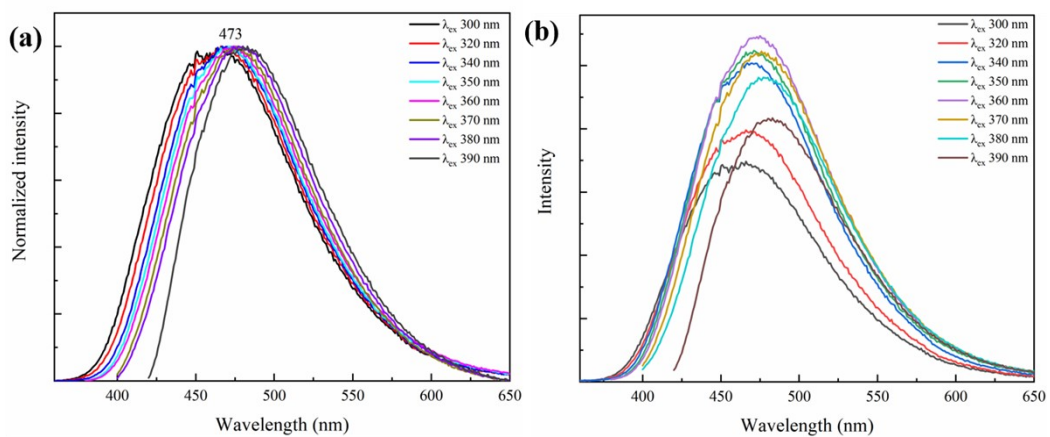

**Fig. S24.** Emission spectra of compound **2** (ground) at different excitation wavelengths (a: normalized, b: unnormalized)

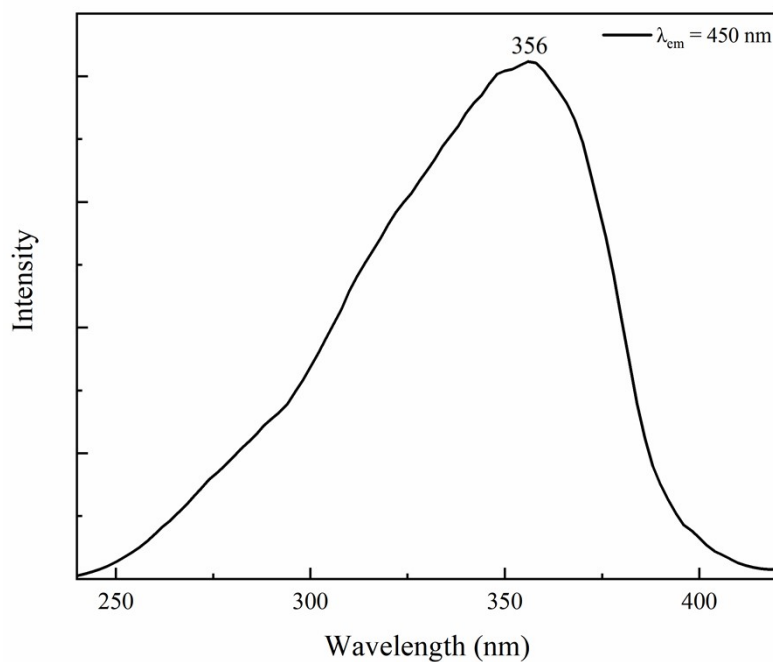

**Fig. S25.** Excitation spectrum of powder **2**

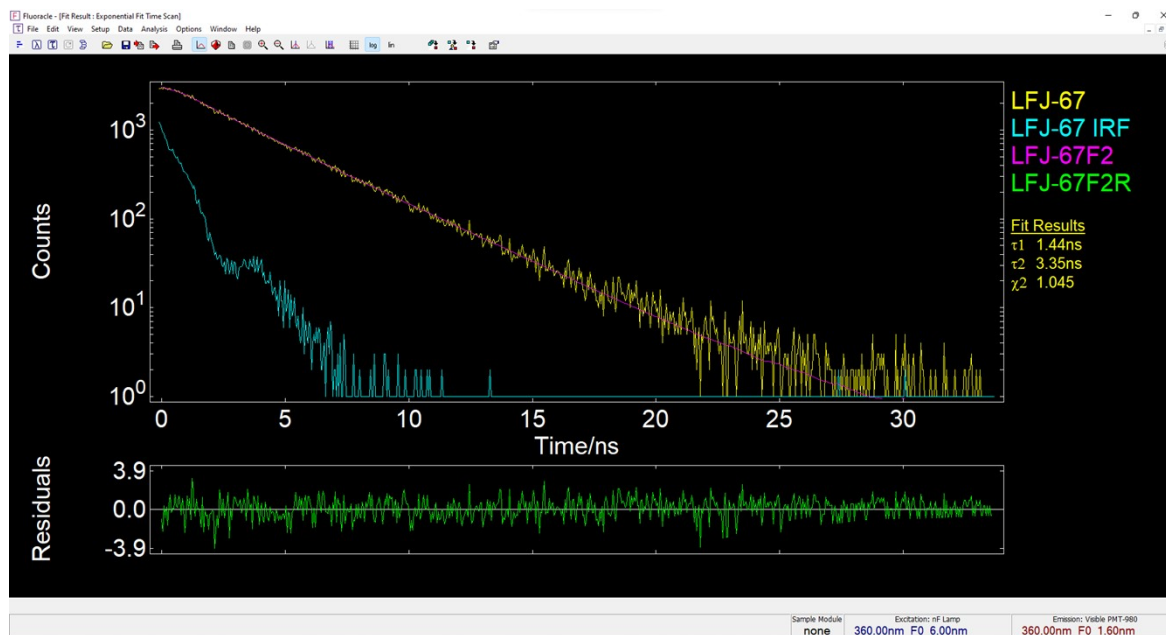

**Fig. S26.** Fluorescence decay curve of powder **2** ( $\lambda_{\text{ex}} = 360 \text{ nm}$ ,  $\lambda_{\text{em}} = 450 \text{ nm}$ )

**Table S6** Some photophysical data of compounds **1-2**

|          | $\lambda_{\text{abs}}^{\text{a}}$<br>(nm) | $\Phi^{\text{b}}$ | $\tau$ (ns) <sup>b</sup> | $k_r^{\text{c}}$ (s <sup>-1</sup> ) | $k_{nr}^{\text{d}}$ (s <sup>-1</sup> ) |
|----------|-------------------------------------------|-------------------|--------------------------|-------------------------------------|----------------------------------------|
| <b>1</b> | 218,308                                   | 0.54 <sup>e</sup> | 3.22                     | $1.68 \times 10^8$                  | $1.42 \times 10^8$                     |
| <b>2</b> | 226, 310                                  | 0.39 <sup>f</sup> | 2.96                     | $1.45 \times 10^8$                  | $1.93 \times 10^8$                     |

<sup>a</sup>Measured in THF,  $1 \times 10^{-5}$ ; <sup>b</sup>powder; <sup>c</sup> $k_r = \Phi/\tau$ ; <sup>d</sup> $k_{nr} = 1/\tau - k_r$ ; <sup>e</sup> $\lambda_{\text{ex}} = 340 \text{ nm}$ .
